# Supplementary material
Source: PubMed Central journal article supplement (PMC5488349)
Supplement: Supp_Fig2.pdf [file Supp_Fig2.pdf]

$\beta$ -N-acetylhexosaminidase  $\alpha$ -subunit amino acid sequences

|        |     |   |   |   |   |   |   |   |   |   |   |   |   |   |   |   |   |   |   |   |   |   |   |   |   |   |   |   |   |   |   |   |   |   |   |   |   |   |   |   |   |   |   |   |   |   |   |   |   |   |     |   |   |   |   |   |   |   |   |   |     |     |
|--------|-----|---|---|---|---|---|---|---|---|---|---|---|---|---|---|---|---|---|---|---|---|---|---|---|---|---|---|---|---|---|---|---|---|---|---|---|---|---|---|---|---|---|---|---|---|---|---|---|---|---|-----|---|---|---|---|---|---|---|---|---|-----|-----|
| Monkey | 1   | M | A | S | S | R | L | W | F | S | L | L | L | A | A | A | F | A | G | R | A | T | A | L | W | P | W | P | Q | N | I | Q | T | S | D | Q | R | Y | V | L | P | N | N | F | Q | F | Q | Y | D | I | S   | S | A | A | Q | P | G | C | S | V | 60  |     |
| Human  |     | M | T | S | S | R | L | W | F | S | L | L | L | A | A | A | F | A | G | R | A | T | A | L | W | P | W | P | Q | N | F | Q | T | S | D | Q | R | Y | V | L | P | N | N | F | Q | F | Q | Y | D | V | S   | S | A | A | Q | P | G | C | S | V |     |     |
| Monkey | 61  | L | D | E | A | F | Q | R | Y | R | D | L | L | F | G | S | G | S | W | P | R | P | Y | R | T | G | K | R | H | T | P | E | K | N | V | L | V | V | S | V | V | T | P | G | C | N | Q | L | P | T | L   | E | S | V | E | N | Y | T | L | T | I   | 120 |
| Human  |     | L | D | E | A | F | Q | R | Y | R | D | L | L | F | G | S | G | S | W | P | R | P | Y | L | T | G | K | R | H | T | L | E | K | N | V | L | V | V | S | V | V | T | P | G | C | N | Q | L | P | T | L   | E | S | V | E | N | Y | T | L | T | I   |     |
| Monkey | 121 | N | D | D | Q | C | L | L | L | S | E | T | V | W | G | A | L | R | G | L | E | T | F | S | Q | L | V | W | K | S | A | E | G | T | F | F | I | N | K | T | E | I | E | D | F | P | R | F | P | H | R   | G | L | L | D | T | S | R | H | Y | 180 |     |
| Human  |     | N | D | D | Q | C | L | L | L | S | E | T | V | W | G | A | L | R | G | L | E | T | F | S | Q | L | V | W | K | S | A | E | G | T | F | F | I | N | K | T | E | I | E | D | F | P | R | F | P | H | R   | G | L | L | D | T | S | R | H | Y |     |     |
| Monkey | 181 | L | P | L | S | S | I | L | D | T | L | D | V | M | A | Y | N | K | L | N | V | F | H | W | H | L | V | D | D | P | S | F | P | Y | E | S | F | T | F | P | E | L | M | R | K | S | Y | N | P | V | T   | H | I | Y | T | A | Q | D | V | K | 240 |     |
| Human  |     | L | P | L | S | S | I | L | D | T | L | D | V | M | A | Y | N | K | L | N | V | F | H | W | H | L | V | D | D | P | S | F | P | Y | E | S | F | T | F | P | E | L | M | R | K | S | Y | N | P | V | T   | H | I | Y | T | A | Q | D | V | K |     |     |
| Monkey | 241 | E | V | I | E | Y | A | R | L | R | G | I | R | V | L | A | E | F | D | T | P | G | H | T | L | S | W | G | P | G | I | P | G | L | L | T | P | C | Y | S | G | S | E | P | S | G | T | F | G | P | V   | N | P | S | L | N | N | T | Y | E | F   | 300 |
| Human  |     | E | V | I | E | Y | A | R | L | R | G | I | R | V | L | A | E | F | D | T | P | G | H | T | L | S | W | G | P | G | I | P | G | L | L | T | P | C | Y | S | G | S | E | P | S | G | T | F | G | P | V   | N | P | S | L | N | N | T | Y | E | F   |     |
| Monkey | 301 | M | S | T | F | F | L | E | I | S | S | V | F | P | D | F | Y | L | H | L | G | G | D | E | V | D | F | T | C | W | K | S | N | P | D | I | Q | D | F | M | R | K | K | G | F | G | E | D | F | K | Q   | L | E | S | F | Y | I | Q | T | L | L   | 360 |
| Human  |     | M | S | T | F | F | L | E | V | S | S | V | F | P | D | F | Y | L | H | L | G | G | D | E | V | D | F | T | C | W | K | S | N | P | E | I | Q | D | F | M | R | K | K | G | F | G | E | D | F | K | Q   | L | E | S | F | Y | I | Q | T | L | L   |     |
| Monkey | 361 | D | I | V | S | S | Y | G | K | G | Y | V | V | W | Q | E | V | F | D | N | K | V | K | I | R | P | D | T | I | I | Q | V | W | R | E | E | I | P | V | N | Y | M | K | E | L | E | L | V | T | K | A   | G | F | R | A | L | L | S | A | P | W   | 420 |
| Human  |     | D | I | V | S | S | Y | G | K | G | Y | V | V | W | Q | E | V | F | D | N | K | V | K | I | Q | P | D | T | I | I | Q | V | W | R | E | D | I | P | V | N | Y | M | K | E | L | E | L | V | T | K | A   | G | F | R | A | L | L | S | A | P | W   |     |
| Monkey | 421 | Y | L | N | R | I | S | Y | G | P | D | W | K | D | F | Y | I | V | E | P | L | A | F | E | G | T | P | E | Q | K | A | L | V | I | G | G | E | A | C | M | W | G | E | Y | V | D | N | T | N | L | V   | P | R | L | W | P | R | A | G | A | V   | 480 |
| Human  |     | Y | L | N | R | I | S | Y | G | P | D | W | K | D | F | Y | I | V | E | P | L | A | F | E | G | T | P | E | Q | K | A | L | V | I | G | G | E | A | C | M | W | G | E | Y | V | D | N | T | N | L | V   | P | R | L | W | P | R | A | G | A | V   |     |
| Monkey | 481 | A | E | R | L | W | S | N | K | L | T | S | D | L | T | F | A | Y | E | R | L | S | H | F | R | C | E | L | L | R | R | G | V | Q | A | Q | P | L | H | V | G | Y | C | E | Q | E | F | E | Q | T | 529 |   |   |   |   |   |   |   |   |   |     |     |
| Human  |     | A | E | R | L | W | S | N | K | L | T | S | D | L | T | F | A | Y | E | R | L | S | H | F | R | C | E | L | L | R | R | G | V | Q | A | Q | P | L | N | V | G | F | C | E | Q | E | F | E | Q | T |     |   |   |   |   |   |   |   |   |   |     |     |

**Supplementary Figure S2.** Alignment of monkey (cm) and human  $\beta$ -N-acetylhexosaminidase  $\alpha$ -subunit amino acid sequences. Differences highlighted in *yellow*.
