# Supplementary material
Source: PubMed Central journal article supplement (PMC5488349)
Supplement: Supp_Fig3.pdf [file Supp_Fig3.pdf]

$\beta$ -N-acetylhexosaminidase  $\beta$ -subunit amino acid sequences

|        |     |                                                                   |     |
|--------|-----|-------------------------------------------------------------------|-----|
| Monkey | 1   | MELCGLGLPRPPMLLALLLATLLAAMLALLTQVALVVQVAEATRAPGVSAARGPALWPLP      | 60  |
| Human  |     | MELCGLGLPRPPMLLALLLATLLAAMLALLTQVALVVQVAEAAARAPSVSAKPGPALWPLP     |     |
| Monkey | 61  | LSVKMTPNLLHLAPENFYISHSPNSTAGPSTLLEEAFRRYHSYIFGFYKWDHEPAKSQA       | 120 |
| Human  |     | LSVKMTPNLLHLAPENFYISHSPNSTAGPSTLLEEAFRRYHGYIFGFYKWHHEPAEFQA       |     |
| Monkey | 121 | TAQLQQLLVSITLQSECDAFPNISSDES YTLVKEPVAVLKANRVWGALRGLETFSQLVY      | 180 |
| Human  |     | KTQVQQLLVSITLQSECDAFPNISSDES YTLVKEPVAVLKANRVWGALRGLETFSQLVY      |     |
| Monkey | 181 | QDSCGTF TINESTIIDSPRFP HRGILIDTSRHYLPVKIILKTLDAMAFNKFNVLHWHIVD    | 240 |
| Human  |     | QDSYGTFTINESTIIDSPRFS HRGILIDTSRHYLPVKIILKTLDAMAFNKFNVLHWHIVD     |     |
| Monkey | 241 | DQSFYQSI AFPELSNKGSYSLSHVYTPNDVRMVEYARLRGIRVLP EFDTPGHTLSWGK      | 300 |
| Human  |     | DQSFYQSI TFPPELSNKGSYSLSHVYTPNDVRMVEYARLRGIRVLP EFDTPGHTLSWGK     |     |
| Monkey | 301 | GQKDLLTPCYSRQNKLD SFGPINPTLNTTYSFLT TFFKEISEVFPDQFIHLGGDEVEFKC    | 360 |
| Human  |     | GQKDLLTPCYSRQNKLD SFGPINPTLNTTYSFLT TFFKEISEVFPDQFIHLGGDEVEFKC    |     |
| Monkey | 361 | WESNPKIQDFM KQKGF GDFKKLESFYIQVLDIIATINKGSIVWQEVFDDK V K LAPGTI   | 420 |
| Human  |     | WESNPKIQDFM RQKGF TDFKKLESFYIQVLDIIATINKGSIVWQEVFDDK A K LAPGTI   |     |
| Monkey | 421 | VEVWKN AYPEELS KVTASGFPVILSAPWYLDLISYGQDWRKYYKVEPLDFGGT R EQKQL   | 480 |
| Human  |     | VEVWKS SAYPEELS RVTASGFPVILSAPWYLDLISYGQDWRKYYKVEPLDFGGT Q K QKQL |     |
| Monkey | 481 | FIGGEACLWGEYVDATNLTPRLWPRASAVGERLWSSKDVRDMD GAYDRLTRHRCRMVERG     | 540 |
| Human  |     | FIGGEACLWGEYVDATNLTPRLWPRASAVGERLWSSKDVRDMD DAYDRLTRHRCRMVERG     |     |
| Monkey | 541 | IAAQPLYAGYCNHENV                                                  | 556 |
| Human  |     | IAAQPLYAGYCNHENM                                                  |     |

**Supplementary Figure S3.** Alignment of monkey (cm) and human  $\beta$ -N-acetylhexosaminidase  $\beta$ -subunit amino acid sequences. Differences highlighted in yellow.
